# Supplementary material for: Synthesis of magnetic, fluorescent and mesoporous core-shell-structured nanoparticles for imaging, targeting and photodynamic therapy
Source: Royal Society of Chemistry journal article supplement (doi:10.1039/c1jm10329f), 2011-01-01
Supplement: c1jm10329f.pdf [file c1jm10329f.pdf]

## Supporting Information

### Synthesis of Magnetic, Fluorescent, and Mesoporous Core-Shell –Structured Nanoparticles for Imaging, Targeting and Photodynamic Therapy\*\*

Fang Wang<sup>a</sup>, Xiaolan Chen<sup>\*a</sup>, Zengxia Zhao<sup>a</sup>, Shaoheng Tang<sup>a</sup>, Xiaoqing Huang<sup>a</sup>,  
Chenghong Lin<sup>b</sup>, Congbo Cai<sup>b</sup>, and Nanfeng Zheng<sup>\*a</sup>

<sup>a</sup> State Key Laboratory for Physical Chemistry of Solid Surfaces and Department of Chemistry, Xiamen University, Xiamen 361005, China

E-mail: chenxl@xmu.edu.cn, nfzheng@xmu.edu.cn

<sup>b</sup> Departments of Physics and Communications Engineering, Xiamen University, Xiamen 361005, China

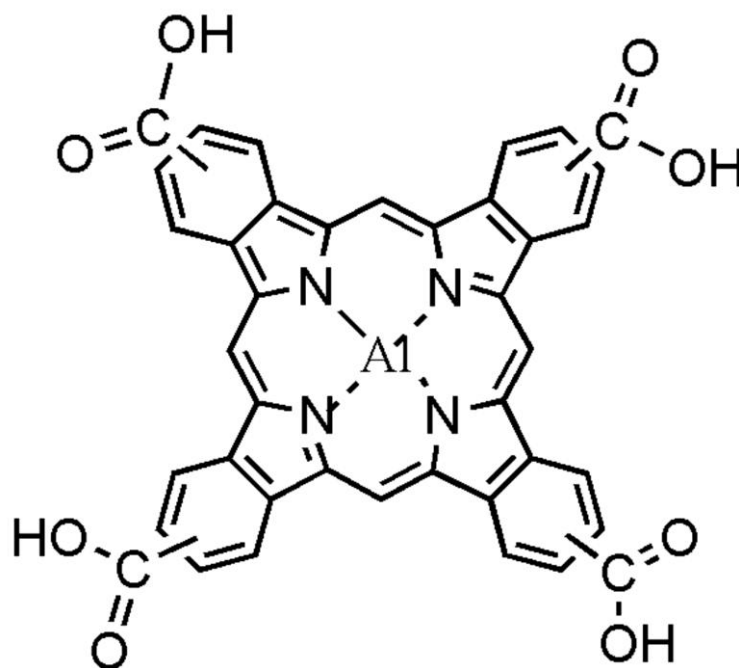

Figure S1. The structure of AlC<sub>4</sub>Pc.

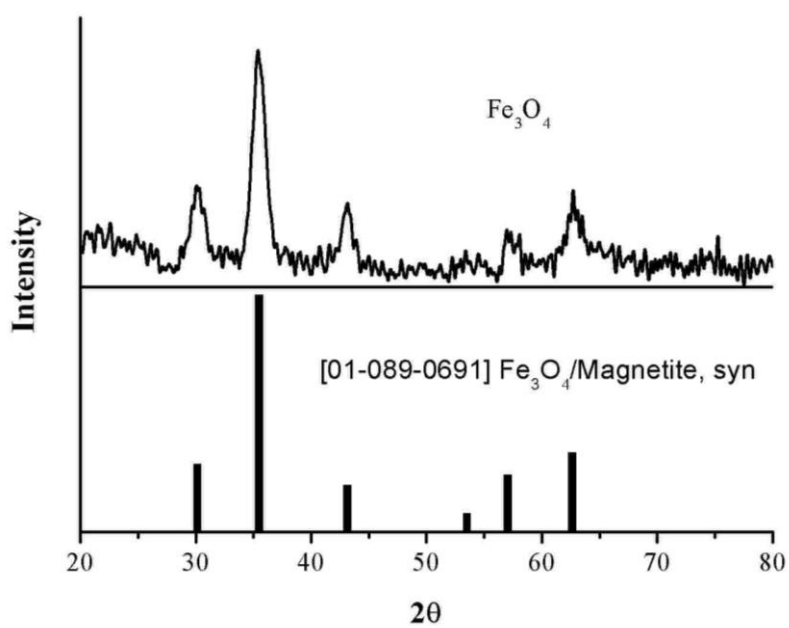

Figure S2. XRD pattern of  $\text{Fe}_3\text{O}_4$  nanoparticles.

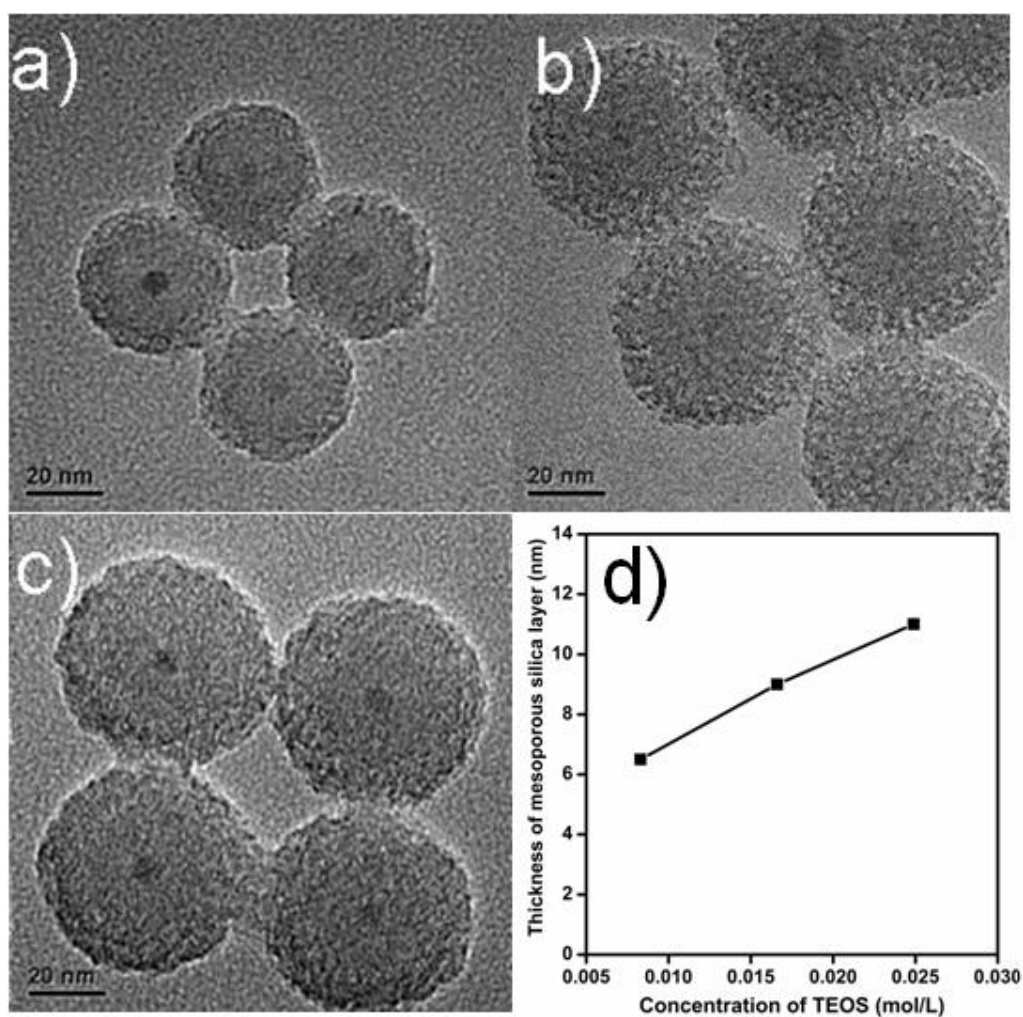

Figure S3. TEM images of Fe<sub>3</sub>O<sub>4</sub>@SiO<sub>2</sub>(F)@meso-SiO<sub>2</sub>(P) with different amounts of TEOS, a)  $8.3 \times 10^{-3}$  mol/L, b)  $1.66 \times 10^{-2}$  mol/L and c)  $2.49 \times 10^{-2}$  mol/L, respectively. d) Effect of TEOS concentration on the thickness of mesoporous silica layer at a fixed 8 h reaction time. The thickness of mesoporous SiO<sub>2</sub> layer from a) to c) is about 6.5 nm, 9 nm and 11 nm, respectively.

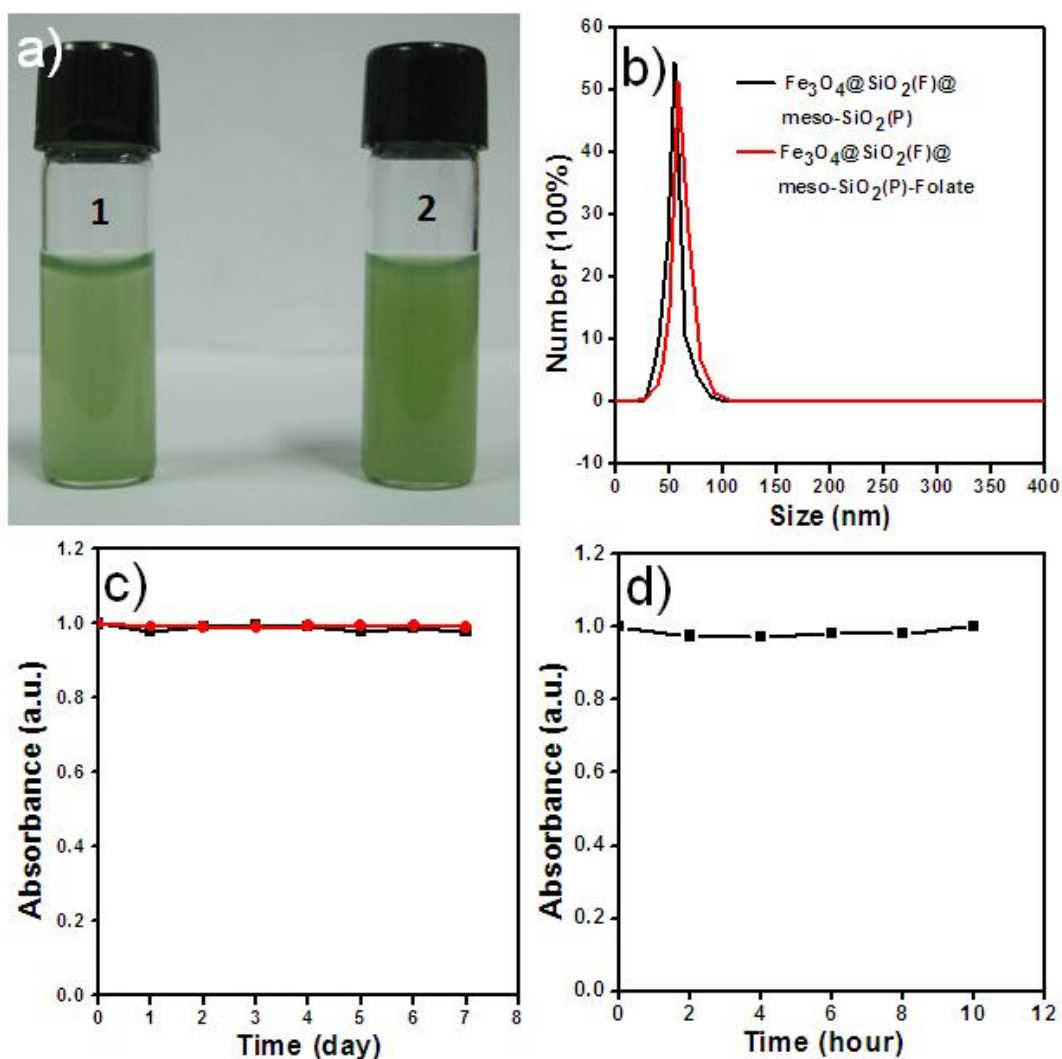

Figure S4. (a) Digital photographs of  $\text{Fe}_3\text{O}_4@ \text{SiO}_2(\text{F})@ \text{meso-SiO}_2(\text{P})$  (1) and  $\text{Fe}_3\text{O}_4@ \text{SiO}_2(\text{F})@ \text{meso-SiO}_2(\text{P})\text{-Folate}$  (2) nanoparticles dispersion in water. (b) DLS of  $\text{Fe}_3\text{O}_4@ \text{SiO}_2(\text{F})@ \text{meso-SiO}_2(\text{P})$  and  $\text{Fe}_3\text{O}_4@ \text{SiO}_2(\text{F})@ \text{meso-SiO}_2(\text{P})\text{-Folate}$  nanoparticles in water. The dispersion stability of  $\text{Fe}_3\text{O}_4@ \text{SiO}_2(\text{F})@ \text{meso-SiO}_2(\text{P})$  or  $\text{Fe}_3\text{O}_4@ \text{SiO}_2(\text{F})@ \text{meso-SiO}_2(\text{P})\text{-Folate}$  nanoparticles in water (red) and in PBS (black) for seven days respectively (c), and in cell medium for 10 h (d).

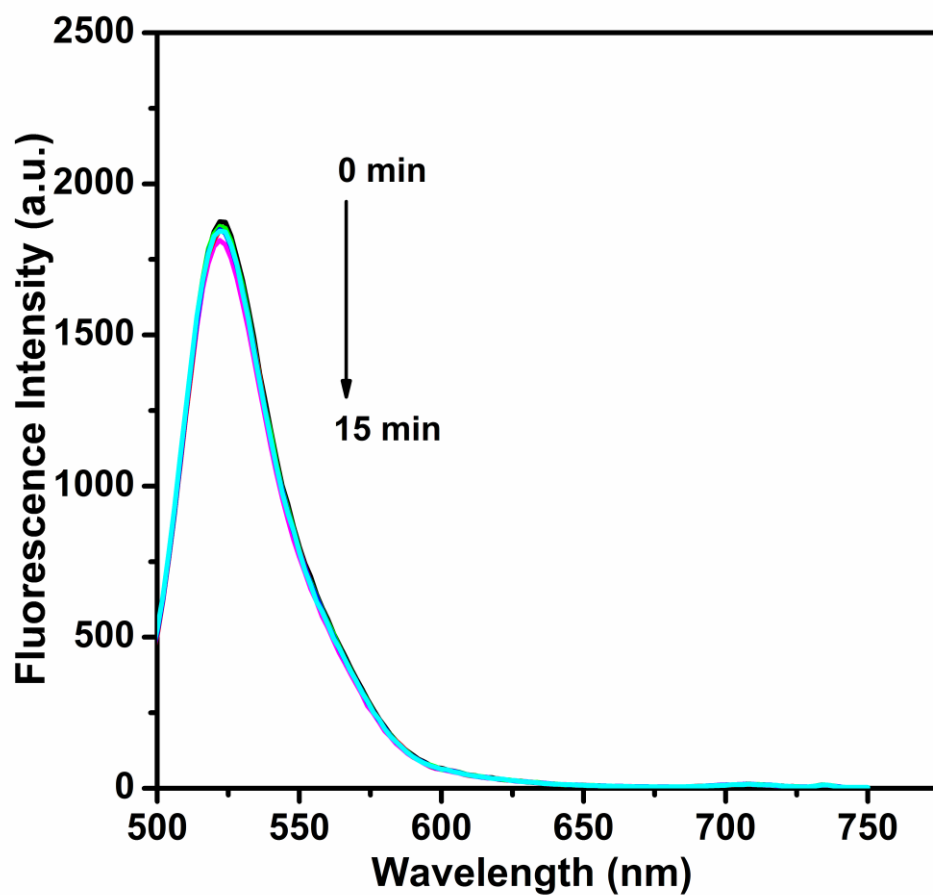

Figure S5. Fluorescence spectra of  $\text{Fe}_3\text{O}_4@\text{SiO}_2(\text{F})@\text{meso-SiO}_2(\text{P})$  under 488 nm excitation after different periods of irradiation with a 660 nm laser beam.

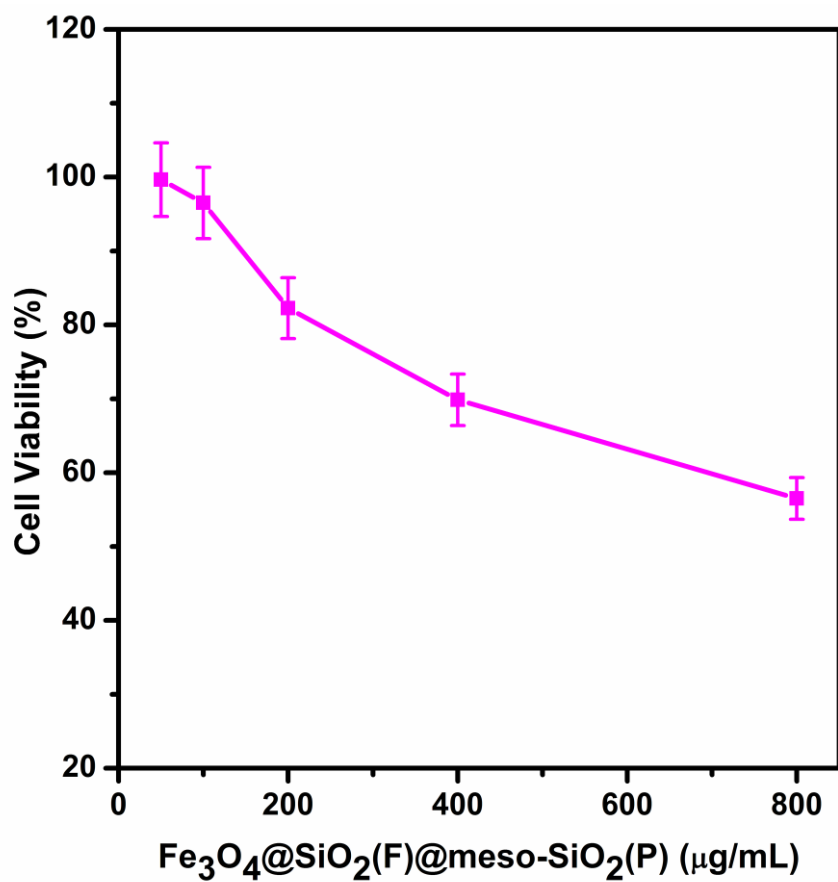

Figure S6. The viability of human hepatocyte cells incubated with Fe<sub>3</sub>O<sub>4</sub>@SiO<sub>2</sub>(F)@meso-SiO<sub>2</sub>(P) at different concentrations.

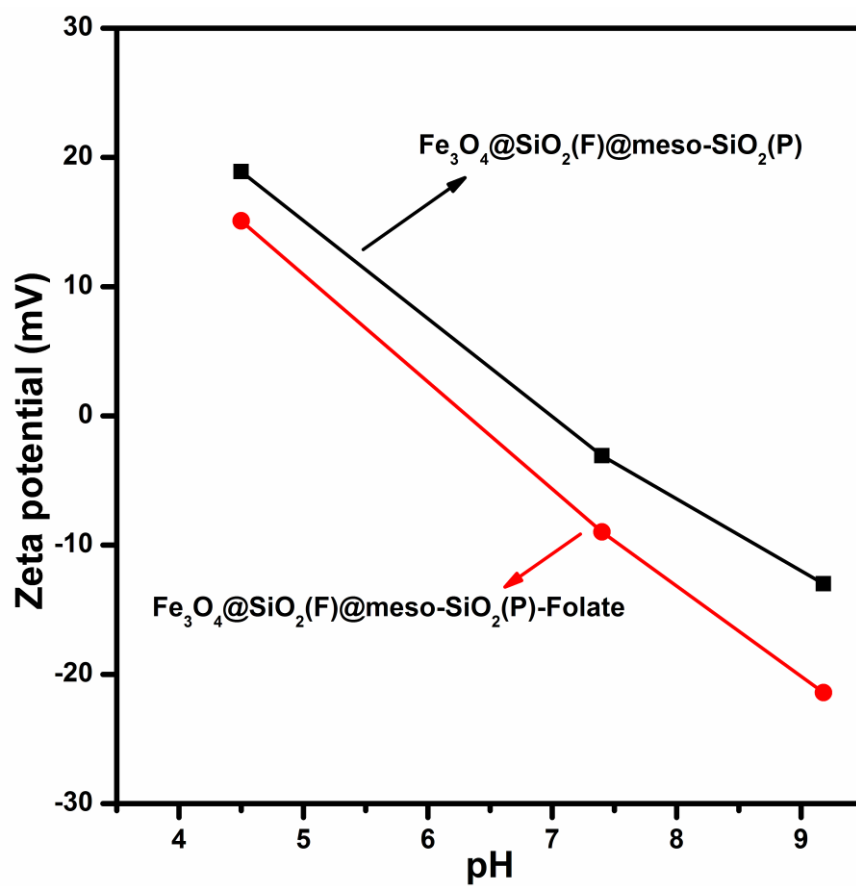

Figure S7. The zeta-potential of  $\text{Fe}_3\text{O}_4@SiO_2(F)@meso-SiO_2(P)$  and  $\text{Fe}_3\text{O}_4@SiO_2(F)@meso-SiO_2(P)\text{-Folate}$  nanoparticles at different pH.

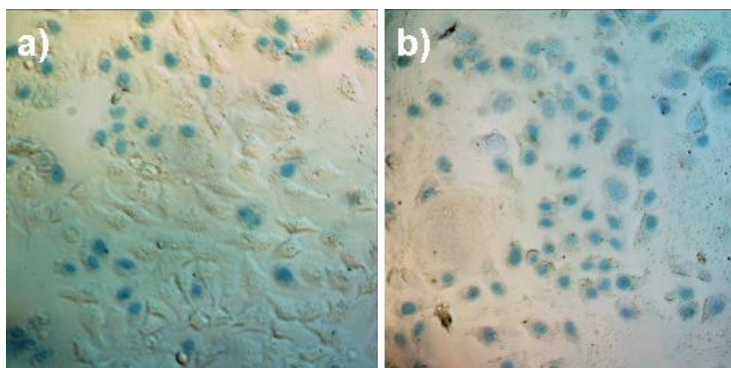

Figure S8. Optical imagings of HeLa cells stained with Trypan blue after different treatment: a) 100  $\mu\text{g/mL}$   $\text{Fe}_3\text{O}_4@\text{SiO}_2(\text{F})@\text{meso-SiO}_2(\text{P})$  and 10-min light exposure with 75  $\text{mW/cm}^2$ ; b) 100  $\mu\text{g/mL}$   $\text{Fe}_3\text{O}_4@\text{SiO}_2(\text{F})@\text{meso-SiO}_2(\text{P})\text{-Folate}$  and 10-min light exposure with 75  $\text{mW/cm}^2$ .



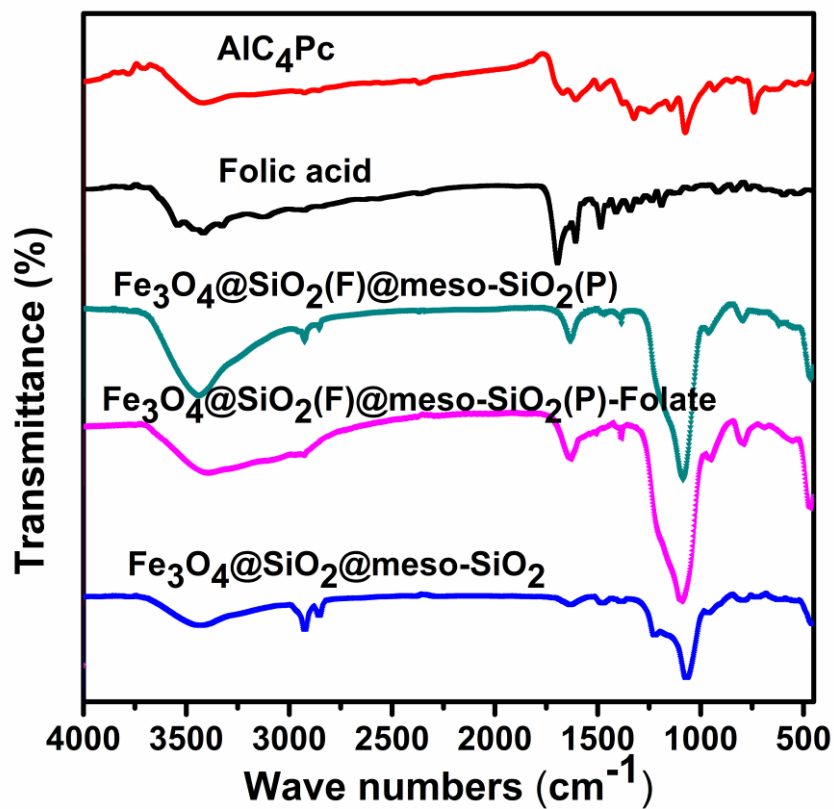

Figure S9. FT-IR spectra of Fe<sub>3</sub>O<sub>4</sub>@SiO<sub>2</sub>(F)@meso-SiO<sub>2</sub>(P) and Fe<sub>3</sub>O<sub>4</sub>@SiO<sub>2</sub>(F)@meso-SiO<sub>2</sub>(P)-Folate.
